# Supplementary figures and images for: In-Vitro Catalytic and Antibacterial Potential of Green Synthesized CuO Nanoparticles against Prevalent Multiple Drug Resistant Bovine Mastitogen Staphylococcus aureus
Source: MDPI journal article supplement (doi:10.3390/ijms23042335), 2022-02-20

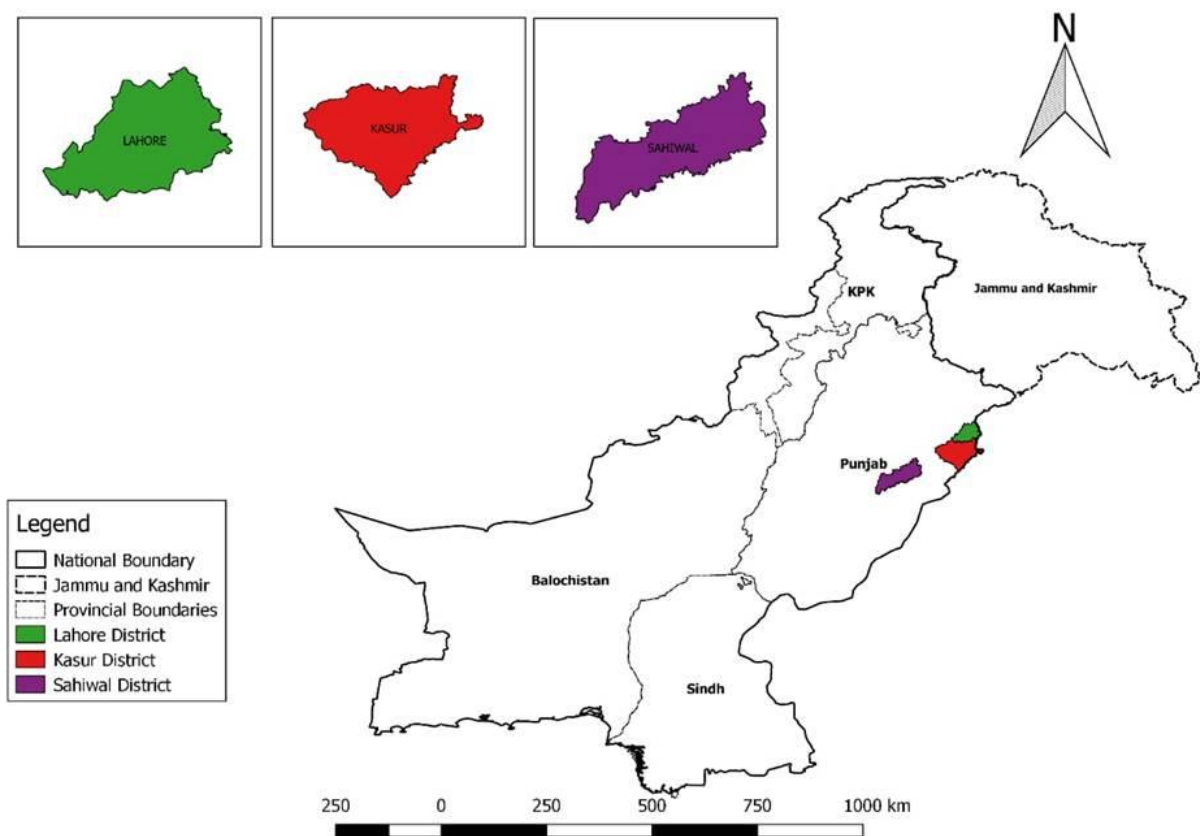

**Figure S1.** Sample collection sites indicated by different colors.

Supplement: s1 [file s1]
